# Supplementary material for: Defining the Relative Role of Insulin Clearance in Early Dysglycemia in Relation to Insulin Sensitivity and Insulin Secretion: The Microbiome and Insulin Longitudinal Evaluation Study (MILES)
Source: MDPI journal article supplement (doi:10.3390/metabo11070420), 2021-06-26
Supplement: s1 [file s1]

Supplementary Table S1. Insulin homeostasis traits in African American individuals with normal glucose tolerance and dysglycemia.

|                     | Normal glucose tolerance (n=65) | Dysglycemia (n=64) | P value |
|---------------------|---------------------------------|--------------------|---------|
| Insulin sensitivity | 4.66 (3.65)                     | 2.57 (1.82)        | <0.0001 |
| Insulin secretion   | 0.50 (0.44)                     | 0.48 (0.38)        | 0.51    |
| Disposition index   | 2.24 (1.06)                     | 1.11 (0.75)        | <0.0001 |
| Insulin clearance   | 0.087 (0.041)                   | 0.084 (0.041)      | 0.30    |

Supplementary Table S2. Insulin homeostasis traits in non-Hispanic White individuals with normal glucose tolerance and dysglycemia.

|                     | Normal glucose tolerance (n=124) | IFG (n=100)  | P value |
|---------------------|----------------------------------|--------------|---------|
| Insulin sensitivity | 6.15 (4.82)                      | 3.03 (2.35)  | <0.0001 |
| Insulin secretion   | 0.31 (0.19)                      | 0.33 (0.31)  | 0.25    |
| Disposition index   | 1.84 (1.15)                      | 0.97 (0.65)  | <0.0001 |
| Insulin clearance   | 0.13 (0.045)                     | 0.11 (0.043) | <0.0001 |

Supplementary Table S3. Insulin homeostasis traits in individuals with normal glucose tolerance and prediabetes.

|                     | Normal glucose tolerance (n=189) | PreDM (n=136) | P value |
|---------------------|----------------------------------|---------------|---------|
| Insulin sensitivity | 5.57 (4.59)                      | 3.08 (2.32)   | <0.0001 |
| Insulin secretion   | 0.35 (0.29)                      | 0.38 (0.39)   | 0.081   |
| Disposition index   | 1.93 (1.10)                      | 1.10 (0.62)   | <0.0001 |
| Insulin clearance   | 0.11 (0.054)                     | 0.093 (0.045) | <0.0001 |

Supplementary Table S4. Insulin homeostasis traits in individuals with normal glucose tolerance and impaired glucose tolerance.

|                     | Normal glucose tolerance (n=189) | IGT (n=63)    | P value |
|---------------------|----------------------------------|---------------|---------|
| Insulin sensitivity | 5.57 (4.59)                      | 2.67 (2.42)   | <0.0001 |
| Insulin secretion   | 0.35 (0.29)                      | 0.33 (0.33)   | 0.74    |
| Disposition index   | 1.93 (1.10)                      | 0.92 (0.38)   | <0.0001 |
| Insulin clearance   | 0.11 (0.054)                     | 0.096 (0.051) | 0.0005  |

Supplementary Table S5. Insulin homeostasis traits in individuals with normal glucose tolerance and impaired fasting glucose.

|                     | Normal glucose tolerance (n=189) | IFG (n=109)   | P value |
|---------------------|----------------------------------|---------------|---------|
| Insulin sensitivity | 5.57 (4.59)                      | 2.76 (2.31)   | <0.0001 |
| Insulin secretion   | 0.35 (0.29)                      | 0.40 (0.38)   | 0.030   |
| Disposition index   | 1.93 (1.10)                      | 1.10 (0.71)   | <0.0001 |
| Insulin clearance   | 0.11 (0.054)                     | 0.092 (0.042) | <0.0001 |

Supplementary Table S6. Parameter estimates and area under the receiver operating characteristics curve for logistic regression models examining the association of four insulin homeostasis traits with prediabetes, in separate models and for models combining traits.

|                         | Base model             | Model 1                | Model 2                | Model 3                | Model 4                | Model 5                | Model 6                |
|-------------------------|------------------------|------------------------|------------------------|------------------------|------------------------|------------------------|------------------------|
| Age                     | 0.039**<br>(0.014)     | 0.014<br>(0.016)       | 0.039**<br>(0.014)     | 0.035*<br>(0.014)      | 0.002<br>(0.017)       | -0.012<br>(0.018)      | -0.007<br>(0.017)      |
| Sex (male)              | 0.584*<br>(0.241)      | 0.207<br>(0.278)       | 0.591*<br>(0.243)      | 0.511*<br>(0.246)      | 0.632*<br>(0.289)      | 0.326<br>(0.307)       | 0.532<br>(0.299)       |
| BMI                     | 0.422**<br>(0.130)     | -0.338*<br>(0.172)     | 0.432**<br>(0.143)     | 0.275<br>(0.141)       | 0.121<br>(0.158)       | -0.418*<br>(0.198)     | -0.156<br>(0.179)      |
| Race (African American) | 0.125<br>(0.257)       | -0.140<br>(0.294)      | 0.135<br>(0.263)       | -0.138<br>(0.278)      | 0.781*<br>(0.325)      | 0.468<br>(0.361)       | 0.342<br>(0.350)       |
| Insulin sensitivity     |                        | -1.568***<br>(0.218)   |                        |                        |                        | -3.278***<br>(0.408)   |                        |
| Insulin secretion       |                        |                        | -0.024<br>(0.138)      |                        |                        | -1.824***<br>(0.309)   |                        |
| Insulin clearance       |                        |                        |                        | -0.394**<br>(0.146)    |                        | 0.116<br>(0.298)       | -0.690***<br>(0.184)   |
| Disposition index       |                        |                        |                        |                        | -1.951***<br>(0.240)   |                        | -2.112***<br>(0.259)   |
| AUROC                   | 0.654<br>(0.596-0.712) | 0.799<br>(0.749-0.852) | 0.655<br>(0.594-0.716) | 0.676<br>(0.618-0.734) | 0.846<br>(0.801-0.886) | 0.871<br>(0.831-0.908) | 0.860<br>(0.818-0.900) |
| AIC                     | 426.245                | 356.295                | 428.214                | 420.708                | 319.964                | 299.530                | 306.596                |

\*P<0.05; \*\*P<0.01; \*\*\*P<0.001

Parameter estimates are listed with standard error in parentheses.

Supplementary Table S7. Comparisons of AUROC values from different logistic regression models for prediabetes.

|                                                           | Base model             | Model 1               | Model 2                | Model 3                | Model 4 | Model 5 | Model 6 |
|-----------------------------------------------------------|------------------------|-----------------------|------------------------|------------------------|---------|---------|---------|
| Base model                                                | -                      | -4.92                 | -0.68                  | -1.08                  | -6.04   | -6.85   | -6.60   |
| Model 1: base + insulin sensitivity                       | 8.74x10 <sup>-7</sup>  | -                     | 4.81                   | 5.603                  | -1.37   | -3.73   | -2.42   |
| Model 2: base + insulin secretion                         | 0.50                   | 1.54x10 <sup>-6</sup> | -                      | -0.98                  | -6.07   | -6.81   | -6.60   |
| Model 3: base + insulin clearance                         | 0.28                   | 2.10x10 <sup>-8</sup> | 0.33                   | -                      | -5.19   | -6.76   | -6.41   |
| Model 4: base + disposition index                         | 1.59x10 <sup>-9</sup>  | 0.17                  | 1.29x10 <sup>-9</sup>  | 2.06x10 <sup>-7</sup>  | -       | -1.90   | -1.61   |
| Model 5: base + insulin sensitivity, secretion, clearance | 7.65x10 <sup>-12</sup> | 1.89x10 <sup>-4</sup> | 9.63x10 <sup>-12</sup> | 1.34x10 <sup>-11</sup> | 0.057   | -       | 1.31    |
| Model 6: base + insulin clearance, disposition index      | 4.11x10 <sup>-11</sup> | 0.016                 | 4.25x10 <sup>-11</sup> | 1.43x10 <sup>-10</sup> | 0.11    | 0.19    | -       |

Values above the diagonal (upper right) are the Z scores. Values below the diagonal (lower left) are the P values.

Supplementary Table S8. Parameter estimates and area under the receiver operating characteristics curve for logistic regression models examining the association of four insulin homeostasis traits with impaired glucose tolerance, in separate models and for models combining traits.

|                         | Base model             | Model 1                | Model 2                | Model 3                | Model 4                | Model 5                | Model 6                |
|-------------------------|------------------------|------------------------|------------------------|------------------------|------------------------|------------------------|------------------------|
| Age                     | 0.092***<br>(0.020)    | 0.068**<br>(0.023)     | 0.094***<br>(0.020)    | 0.090***<br>(0.020)    | 0.058*<br>(0.028)      | 0.029<br>(0.030)       | 0.051<br>(0.030)       |
| Sex (male)              | 0.125<br>(0.329)       | -0.566<br>(0.409)      | 0.186<br>(0.333)       | 0.050<br>(0.336)       | -0.126<br>(0.452)      | -0.620<br>(0.502)      | -0.215<br>(0.481)      |
| BMI                     | 0.540**<br>(0.177)     | -0.387<br>(0.238)      | 0.645***<br>(0.195)    | 0.375<br>(0.192)       | 0.058<br>(0.238)       | -0.791*<br>(0.344)     | -0.382<br>(0.297)      |
| Race (African American) | 0.266<br>(0.341)       | 0.014<br>(0.402)       | 0.374<br>(0.352)       | -0.003<br>(0.366)      | 1.263*<br>(0.498)      | 0.878<br>(0.553)       | 0.881<br>(0.547)       |
| Insulin sensitivity     |                        | -1.802***<br>(0.303)   |                        |                        |                        | -4.773***<br>(0.743)   |                        |
| Insulin secretion       |                        |                        | -0.249<br>(0.180)      |                        |                        | -3.015***<br>(0.515)   |                        |
| Insulin clearance       |                        |                        |                        | -0.412*<br>(0.189)     |                        | -0.006<br>(0.395)      | -0.799**<br>(0.262)    |
| Disposition index       |                        |                        |                        |                        | -3.049***<br>(0.444)   |                        | -3.128***<br>(0.466)   |
| AUROC                   | 0.725<br>(0.654-0.792) | 0.849<br>(0.793-0.907) | 0.730<br>(0.656-0.801) | 0.743<br>(0.674-0.810) | 0.920<br>(0.879-0.958) | 0.934<br>(0.894-0.970) | 0.929<br>(0.886-0.968) |
| AIC                     | 260.374                | 209.566                | 260.447                | 257.514                | 153.513                | 143.476                | 144.909                |

\*P<0.05; \*\*P<0.01; \*\*\*P<0.001

Parameter estimates are listed with standard error in parentheses.

Supplementary Table S9. Comparisons of AUROC values from different logistic regression models for impaired glucose tolerance.

|                                                           | Base model            | Model 1               | Model 2               | Model 3               | Model 4 | Model 5 | Model 6 |
|-----------------------------------------------------------|-----------------------|-----------------------|-----------------------|-----------------------|---------|---------|---------|
| Base model                                                | -                     | -3.74                 | -0.084                | -1.00                 | -5.90   | -6.04   | -6.11   |
| Model 1: base + insulin sensitivity                       | 1.87x10 <sup>-4</sup> | -                     | 3.271                 | 3.90                  | -2.50   | -4.02   | -3.18   |
| Model 2: base + insulin secretion                         | 0.93                  | 0.001                 | -                     | -0.62                 | -6.09   | -5.88   | -6.10   |
| Model 3: base + insulin clearance                         | 0.32                  | 9.56x10 <sup>-5</sup> | 0.536                 | -                     | -5.44   | -5.93   | -5.96   |
| Model 4: base + disposition index                         | 3.57x10 <sup>-9</sup> | 0.012                 | 1.17x10 <sup>-9</sup> | 5.21x10 <sup>-8</sup> | -       | -0.97   | -1.47   |
| Model 5: base + insulin sensitivity, secretion, clearance | 1.58x10 <sup>-9</sup> | 5.74x10 <sup>-5</sup> | 4.20x10 <sup>-9</sup> | 2.4x10 <sup>-9</sup>  | 0.033   | -       | 0.36    |
| Model 6: base + insulin clearance, disposition index      | 1.03x10 <sup>-9</sup> | 0.001                 | 1.10x10 <sup>-9</sup> | 2.58x10 <sup>-9</sup> | 0.14    | 0.72    | -       |

Values above the diagonal (upper right) are the Z scores. Values below the diagonal (lower left) are the P values.

Supplementary Table S10. Parameter estimates and area under the receiver operating characteristics curve for logistic regression models examining the association of four insulin homeostasis traits with impaired fasting glucose, in separate models and for models combining traits.

|                         | Base model             | Model 1                | Model 2                | Model 3                | Model 4                | Model 5                | Model 6                |
|-------------------------|------------------------|------------------------|------------------------|------------------------|------------------------|------------------------|------------------------|
| Age                     | 0.031*<br>(0.015)      | -0.001<br>(0.017)      | 0.031*<br>(0.015)      | 0.026<br>(0.015)       | -0.008<br>(0.018)      | -0.027<br>(0.019)      | -0.022<br>(0.019)      |
| Sex (male)              | 0.864***<br>(0.258)    | 0.532<br>(0.298)       | 0.866***<br>(0.261)    | 0.795**<br>(0.263)     | 0.986**<br>(0.311)     | 0.721*<br>(0.330)      | 0.917**<br>(0.324)     |
| BMI                     | 0.556***<br>(0.146)    | -0.217<br>(0.189)      | 0.558***<br>(0.159)    | 0.406**<br>(0.157)     | 0.304<br>(0.176)       | -0.262<br>(0.213)      | 0.003<br>(0.195)       |
| Race (African American) | 0.050<br>(0.276)       | -0.215<br>(0.320)      | 0.053<br>(0.283)       | -0.228<br>(0.301)      | 0.682<br>(0.349)       | 0.401<br>(0.395)       | 0.228<br>(0.375)       |
| Insulin sensitivity     |                        | -1.650***<br>(0.238)   |                        |                        |                        | -3.358***<br>(0.446)   |                        |
| Insulin secretion       |                        |                        | -0.005<br>(0.149)      |                        |                        | -1.787***<br>(0.336)   |                        |
| Insulin clearance       |                        |                        |                        | -0.410*<br>(0.161)     |                        | 0.152<br>(0.347)       | -0.764***<br>(0.204)   |
| Disposition index       |                        |                        |                        |                        | -1.933**<br>(0.255)    |                        | -2.218***<br>(0.279)   |
| AUROC                   | 0.689<br>(0.623-0.746) | 0.820<br>(0.770-0.873) | 0.689<br>(0.628-0.747) | 0.707<br>(0.642-0.761) | 0.854<br>(0.809-0.894) | 0.880<br>(0.839-0.919) | 0.872<br>(0.831-0.911) |
| AIC                     | 369.753                | 304.727                | 371.752                | 365.034                | 278.681                | 257.084                | 265.323                |

\*P<0.05; \*\*P<0.01; \*\*\*P<0.001

Parameter estimates are listed with standard error in parentheses.

Supplementary Table S11. Comparisons of AUROC values from different logistic regression models for impaired fasting glucose.

|                                                           | Base model            | Model 1               | Model 2               | Model 3               | Model 4 | Model 5 | Model 6 |
|-----------------------------------------------------------|-----------------------|-----------------------|-----------------------|-----------------------|---------|---------|---------|
| Base model                                                | -                     | -4.53                 | 0.31                  | -0.85                 | -5.41   | -6.07   | -5.93   |
| Model 1: base + insulin sensitivity                       | 5.84x10 <sup>-6</sup> | -                     | 4.53                  | 5.19                  | -1.06   | -3.36   | -2.17   |
| Model 2: base + insulin secretion                         | 0.76                  | 5.99x10 <sup>-6</sup> | -                     | -0.85                 | -5.43   | -6.07   | -5.94   |
| Model 3: base + insulin clearance                         | 0.40                  | 2.15x10 <sup>-7</sup> | 0.39                  | -                     | -4.72   | -6.06   | -5.81   |
| Model 4: base + disposition index                         | 6.38x10 <sup>-8</sup> | 0.29                  | 5.77x10 <sup>-8</sup> | 2.41x10 <sup>-6</sup> | -       | -1.89   | -1.80   |
| Model 5: base + insulin sensitivity, secretion, clearance | 1.31x10 <sup>-9</sup> | 7.71x10 <sup>-4</sup> | 1.25x10 <sup>-9</sup> | 1.39x10 <sup>-9</sup> | 0.058   | -       | 1.11    |
| Model 6: base + insulin clearance, disposition index      | 3.05x10 <sup>-9</sup> | 0.03                  | 2.84x10 <sup>-9</sup> | 6.40x10 <sup>-9</sup> | 0.072   | 0.27    | -       |

Values above the diagonal (upper right) are the Z scores. Values below the diagonal (lower left) are the P values.

Supplementary Table S12. Parameter estimates and area under the receiver operating characteristics curve for logistic regression models in non-Hispanic Whites examining the association of four insulin homeostasis traits with dysglycemia, in separate models and for models combining traits.

|                     | Base model             | Model 1               | Model 2                | Model 3                | Model 4                | Model 5                | Model 6                |
|---------------------|------------------------|-----------------------|------------------------|------------------------|------------------------|------------------------|------------------------|
| Age                 | 0.067***<br>(0.017)    | 0.031<br>(0.020)      | 0.067***<br>(0.017)    | 0.062***<br>(0.017)    | 0.008<br>(0.021)       | -0.010<br>(0.023)      | -0.001<br>(0.022)      |
| Sex (male)          | 1.038***<br>(0.302)    | 0.704*<br>(0.346)     | 1.062***<br>(0.305)    | 0.993**<br>(0.310)     | 1.157**<br>(0.374)     | 0.945*<br>(0.395)      | 1.122**<br>(0.387)     |
| BMI                 | 0.499***<br>(0.168)    | -0.447<br>(0.240)     | 0.544**<br>(0.185)     | 0.251<br>(0.190)       | 0.032<br>(0.217)       | -0.640*<br>(0.295)     | -0.357<br>(0.262)      |
| Insulin sensitivity |                        | -1.662***<br>(0.285)  |                        |                        |                        | -3.418***<br>(0.599)   |                        |
| Insulin secretion   |                        |                       | -0.107<br>(0.175)      |                        |                        | -2.005***<br>(0.401)   |                        |
| Insulin clearance   |                        |                       |                        | -0.582**<br>(0.200)    |                        | 0.087<br>(0.416)       | -0.770*<br>(0.248)     |
| Disposition index   |                        |                       |                        |                        | -2.149***<br>(0.323)   |                        | -2.259***<br>(0.347)   |
| AUROC               | 0.731<br>(0.667-0.797) | 0.833<br>(0.78-0.889) | 0.732<br>(0.669-0.796) | 0.755<br>(0.688-0.818) | 0.879<br>(0.831-0.918) | 0.897<br>(0.851-0.934) | 0.893<br>(0.845-0.929) |
| AIC                 | 274.475                | 228.333               | 276.099                | 267.447                | 201.146                | 190.582                | 192.427                |

\*P<0.05; \*\*P<0.01; \*\*\*P<0.001

Parameter estimates are listed with standard error in parentheses.

Supplementary Table S13. Comparisons of AUROC values from different logistic regression models for dysglycemia in non-Hispanic Whites.

|                                                           | Base model            | Model 1               | Model 2               | Model 3               | Model 4 | Model 5 | Model 6 |
|-----------------------------------------------------------|-----------------------|-----------------------|-----------------------|-----------------------|---------|---------|---------|
| Base model                                                | -                     | -3.86                 | 0                     | -1.31                 | -4.59   | -5.16   | -5.14   |
| Model 1: base + insulin sensitivity                       | 1.12x10 <sup>-4</sup> | -                     | 3.65                  | 4.21                  | -1.20   | -2.97   | -2.34   |
| Model 2: base + insulin secretion                         | >.99                  | 2.60x10 <sup>-4</sup> | -                     | -1.18                 | -4.729  | -5.119  | -5.16   |
| Model 3: base + insulin clearance                         | 0.19                  | 2.52x10 <sup>-5</sup> | 0.24                  | -                     | -3.77   | -4.97   | -4.90   |
| Model 4: base + disposition index                         | 4.35x10 <sup>-6</sup> | 0.23                  | 2.26x10 <sup>-6</sup> | 1.66x10 <sup>-4</sup> | -       | -1.48   | -1.59   |
| Model 5: base + insulin sensitivity, secretion, clearance | 2.42x10 <sup>-7</sup> | 0.002                 | 3.07x10 <sup>-7</sup> | 6.78x10 <sup>-7</sup> | 0.14    | -       | 0.58    |
| Model 6: base + insulin clearance, disposition index      | 2.77x10 <sup>-7</sup> | 0.019                 | 2.45x10 <sup>-7</sup> | 9.5x10 <sup>-7</sup>  | 0.11    | 0.56    | -       |

Values above the diagonal (upper right) are the Z scores. Values below the diagonal (lower left) are the P values.

Supplementary Table S14. Parameter estimates and area under the receiver operating characteristics curve for logistic regression models in African Americans examining the association of four insulin homeostasis traits with dysglycemia, in separate models and for models combining traits.

|                     | Base model             | Model 1                | Model 2                | Model 3                | Model 4                | Model 5                | Model 6                |
|---------------------|------------------------|------------------------|------------------------|------------------------|------------------------|------------------------|------------------------|
| Age                 | 0.005<br>(.021)        | -0.002<br>(0.025)      | 0.005<br>(0.021)       | 0.005<br>(0.021)       | -0.010<br>(0.028)      | -0.023<br>(0.031)      | -0.021<br>(0.030)      |
| Sex (male)          | -0.127<br>(0.383)      | -0.512<br>(0.462)      | -0.090<br>(0.386)      | -0.155<br>(0.387)      | -0.269<br>(0.496)      | -0.596<br>(0.541)      | -0.378<br>(0.520)      |
| BMI                 | 0.412*<br>(0.198)      | -0.149<br>(0.234)      | 0.469**<br>(0.205)     | 0.384*<br>(0.203)      | 0.122 (0.247)          | -0.288<br>(0.285)      | -0.089<br>(0.272)      |
| Insulin sensitivity |                        | -1.686***<br>(.339)    |                        |                        |                        | -3.649***<br>(0.661)   |                        |
| Insulin secretion   |                        |                        | -0.229<br>(0.195)      |                        |                        | -2.053***<br>(0.510)   |                        |
| Insulin clearance   |                        |                        |                        | -0.129<br>(0.207)      |                        | 0.064<br>(0.451)       | -0.683*<br>(0.285)     |
| Disposition index   |                        |                        |                        |                        | -2.014***<br>(0.362)   |                        | -2.270***<br>(0.406)   |
| AUROC               | 0.633<br>(0.541-0.733) | 0.802<br>(0.723-0.871) | 0.632<br>(0.536-0.722) | 0.630<br>(0.538-0.727) | 0.865<br>(0.793-0.921) | 0.897<br>(0.834-0.943) | 0.882<br>(0.819-0.929) |
| AIC                 | 181.781                | 148.259                | 182.385                | 183.388                | 125.151                | 116.391                | 121.047                |

\*P<0.05; \*\*P<0.01; \*\*\*P<0.001

Parameter estimates are listed with standard error in parentheses.

Supplementary Table S15. Comparisons of AUROC values from different logistic regression models for dysglycemia in African Americans.

|                                                           | Base model            | Model 1 | Model 2               | Model 3               | Model 4 | Model 5 | Model 6 |
|-----------------------------------------------------------|-----------------------|---------|-----------------------|-----------------------|---------|---------|---------|
| Base model                                                | -                     | -2.88   | 0.46                  | -0.047                | -4.19   | -4.79   | -4.49   |
| Model 1: base + insulin sensitivity                       | 0.004                 | -       | 2.67                  | 3.09                  | -1.46   | -3.03   | -2.01   |
| Model 2: base + insulin secretion                         | 0.64                  | 0.008   | -                     | -0.35                 | -5.03   | -5.08   | -5.03   |
| Model 3: base + insulin clearance                         | 0.96                  | 0.002   | 0.72                  | -                     | -4.00   | -4.76   | -4.44   |
| Model 4: base + disposition index                         | 2.82x10 <sup>-5</sup> | 0.15    | 4.8x10 <sup>-7</sup>  | 6.44x10 <sup>-5</sup> | -       | -1.695  | -1.15   |
| Model 5: base + insulin sensitivity, secretion, clearance | 1.69x10 <sup>-6</sup> | 0.002   | 3.70x10 <sup>-7</sup> | 1.98x10 <sup>-6</sup> | 0.090   | -       | 1.33    |
| Model 6: base + insulin clearance, disposition index      | 7.28x10 <sup>-6</sup> | 0.045   | 5.01x10 <sup>-7</sup> | 9.03x10 <sup>-6</sup> | 0.25    | 0.18    | -       |

Values above the diagonal (upper right) are the Z scores. Values below the diagonal (lower left) are the P values.
